# Supplementary material
Source: MDPI journal article supplement (https://www.mdpi.com/2072-4292/13/19/4018)
Supplement: s1 [file s1]

# A Universal Fuzzy Logic Optical Water Type Scheme for the Global Oceans

Tianxia Jia <sup>1,2</sup>, Yonglin Zhang <sup>1</sup>, Rencai Dong <sup>1,\*</sup>

<sup>1</sup> State Key Laboratory of Urban and Regional Ecology, Research Center for Eco-environmental Sciences, Chinese Academy of Sciences, Beijing 100085, China;

<sup>2</sup> University of Chinese Academy of Sciences, Beijing 100049, China

\* Correspondence author at: State Key Laboratory of Urban and Regional Ecology, Research Center for Eco-environmental Sciences, Chinese Academy of Sciences, Beijing 100085, China.

*E-mail address:* [dongrencai@rcees.ac.cn](mailto:dongrencai@rcees.ac.cn) (R. Dong)

## Supplementary Materials

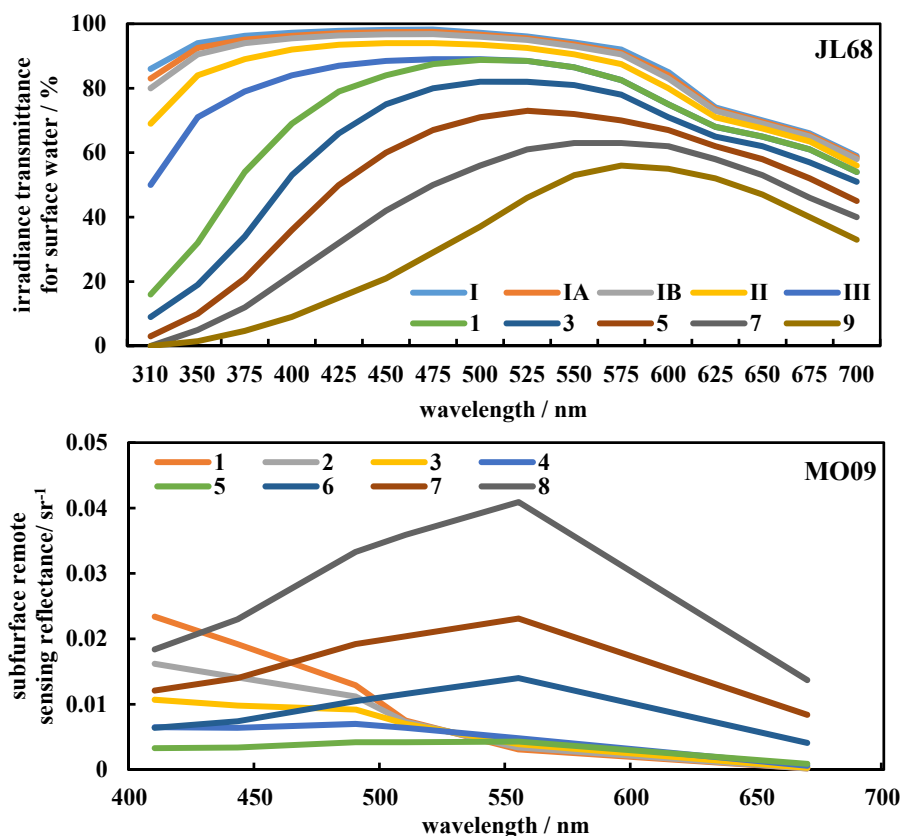

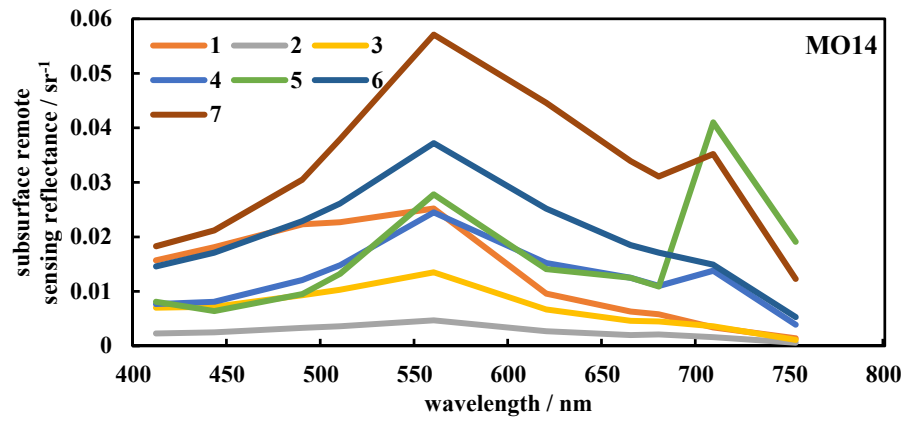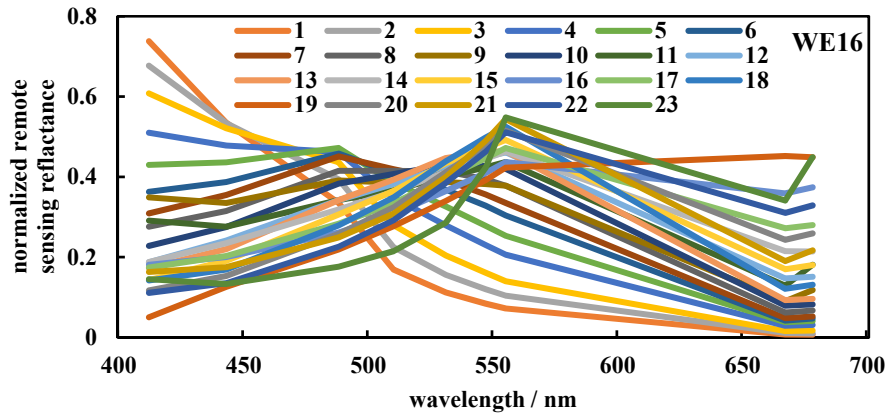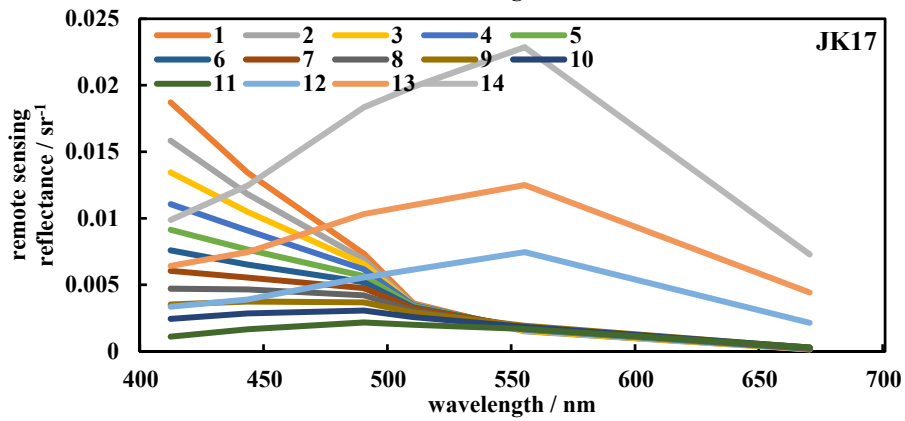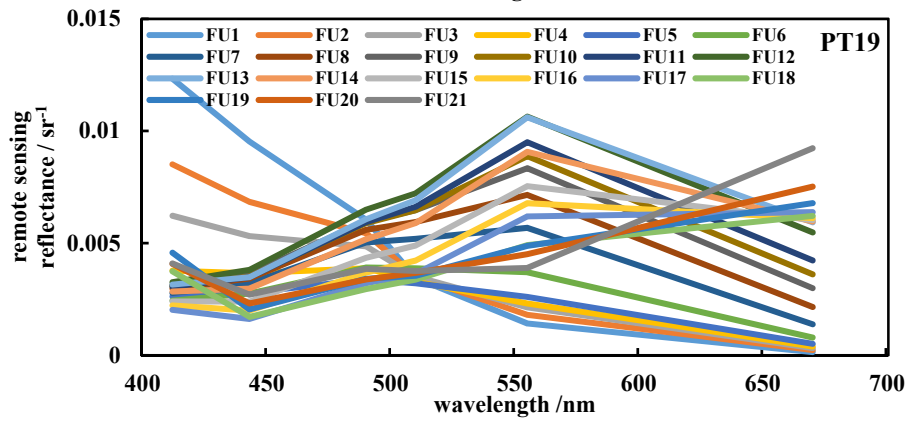

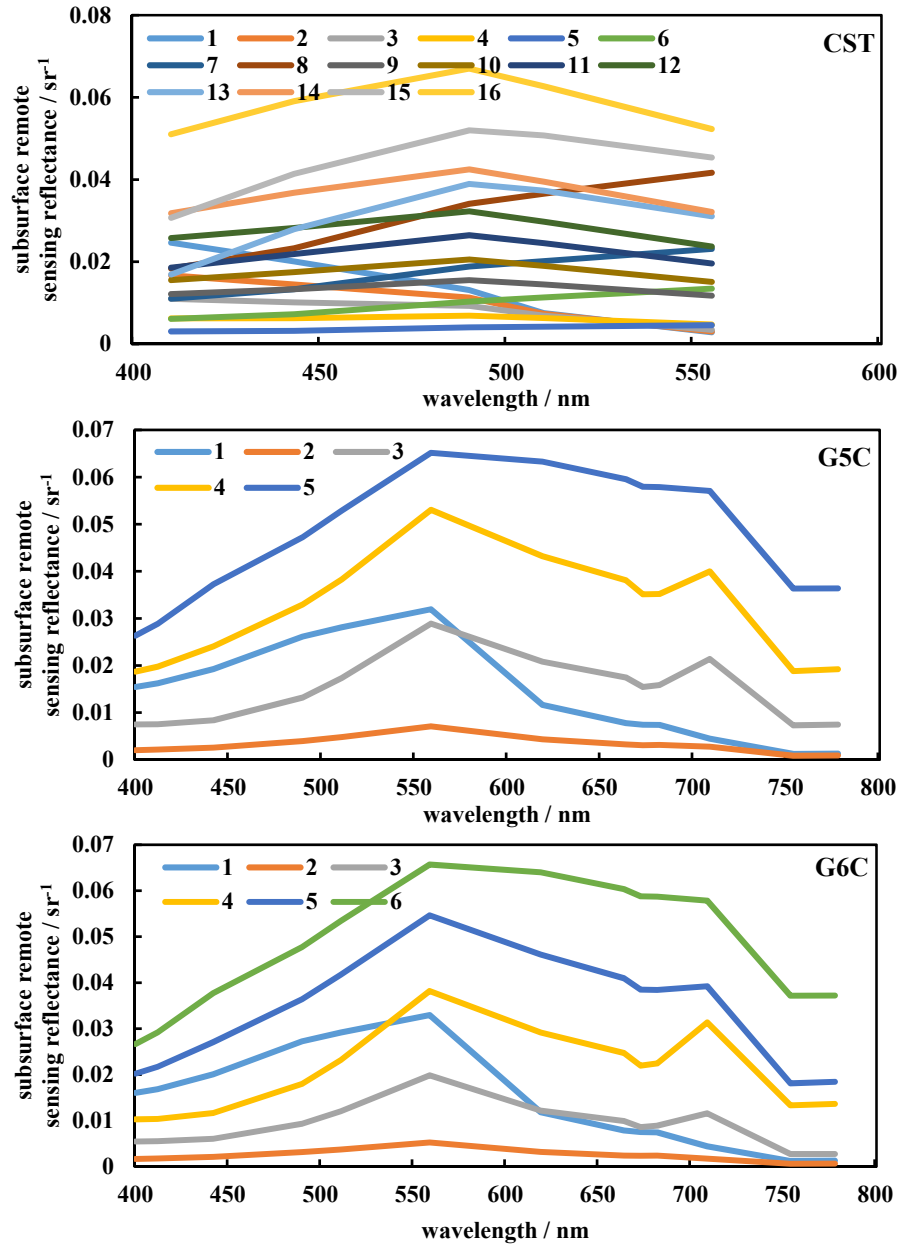

**Figure S1.** Mean vectors of the AOP-based OWT schemes from previous studies.

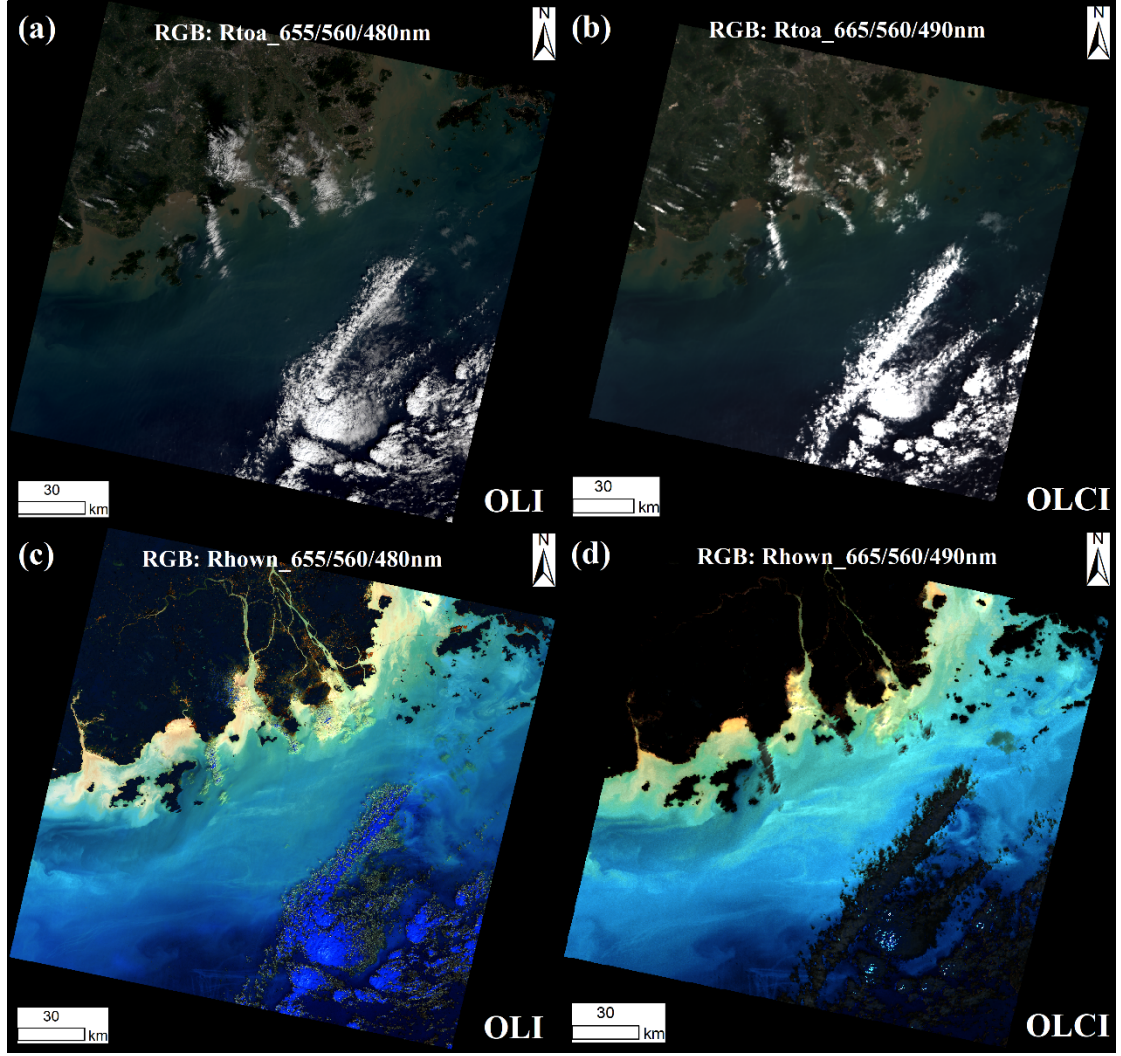

**Figure S2.** The true color composites of two concurrent (2017/10/23) Landsat-8 OLI and Sentinel-3A OLCI images, before and after the C2RCC atmospheric correction processing. (a) Top of atmosphere radiance ( $R_{toa}$ ) 655/560/480 nm composite of the raw OLI image; (b) top of atmosphere radiance ( $R_{toa}$ ) 665/560/490 nm composite of the raw OLCI image; (c) normalized water-leaving radiance ( $R_{hown}$ ) 655/560/480 nm composite of the OLI image after C2RCC atmospheric correction; (d) normalized water-leaving radiance ( $R_{hown}$ ) 665/560/490 nm composite of the OLI image after C2RCC atmospheric correction. Note that the OLCI image was georeferenced and resized according to the OLI image.

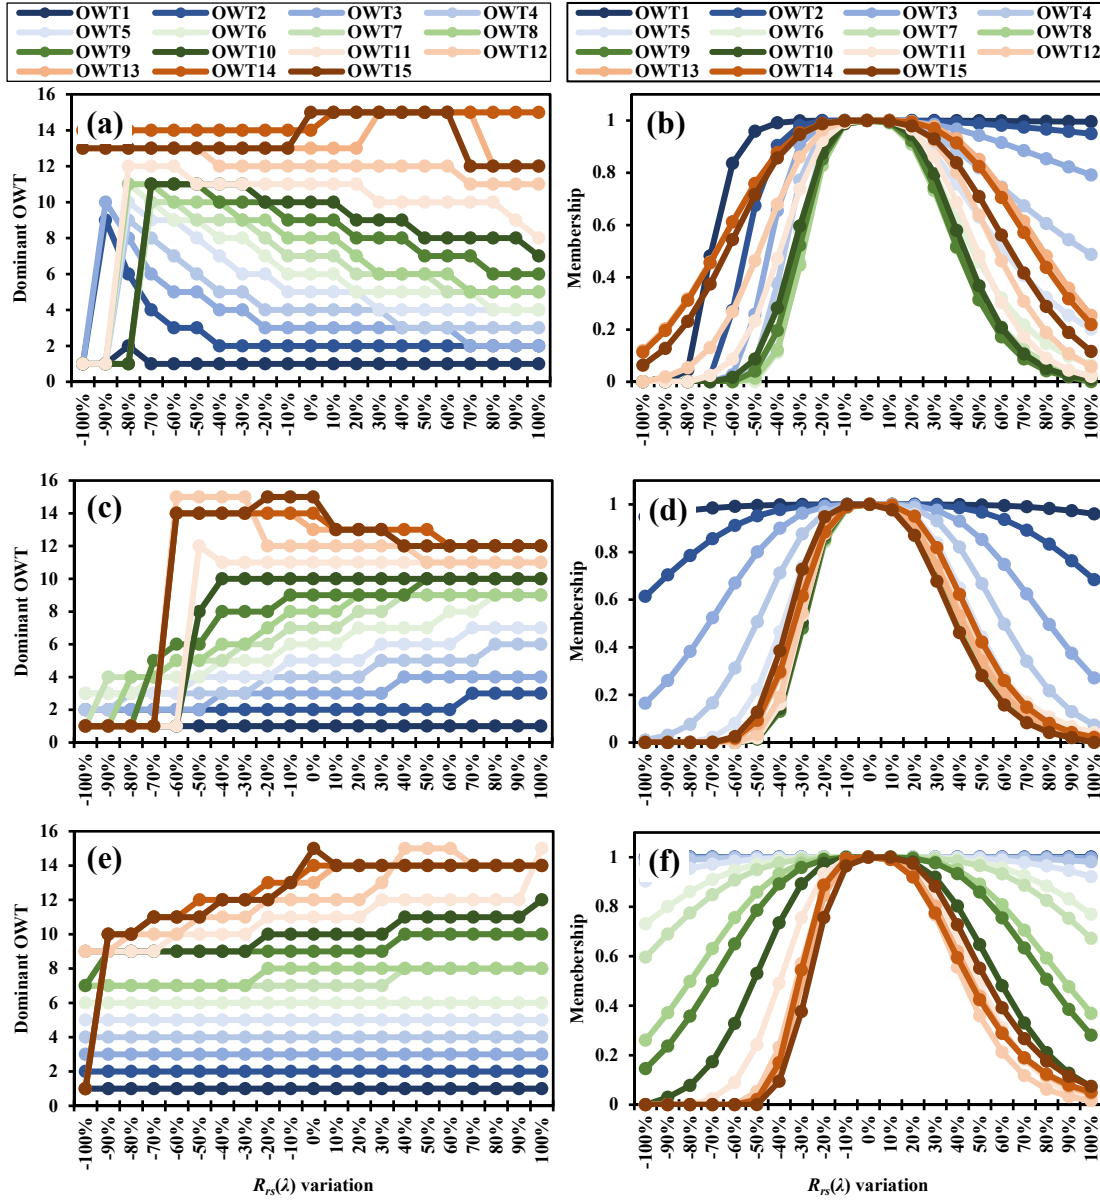

**Figure S3.** The U-OWT dominant OWT and membership changes of 15 OLI (4 bands) mean  $R_{rs}(\lambda)$  vectors under the variations of (a-b) the blue bands (400-500nm), (c-d) the green bands (500-600nm), (e-f) the red bands (600-700nm).

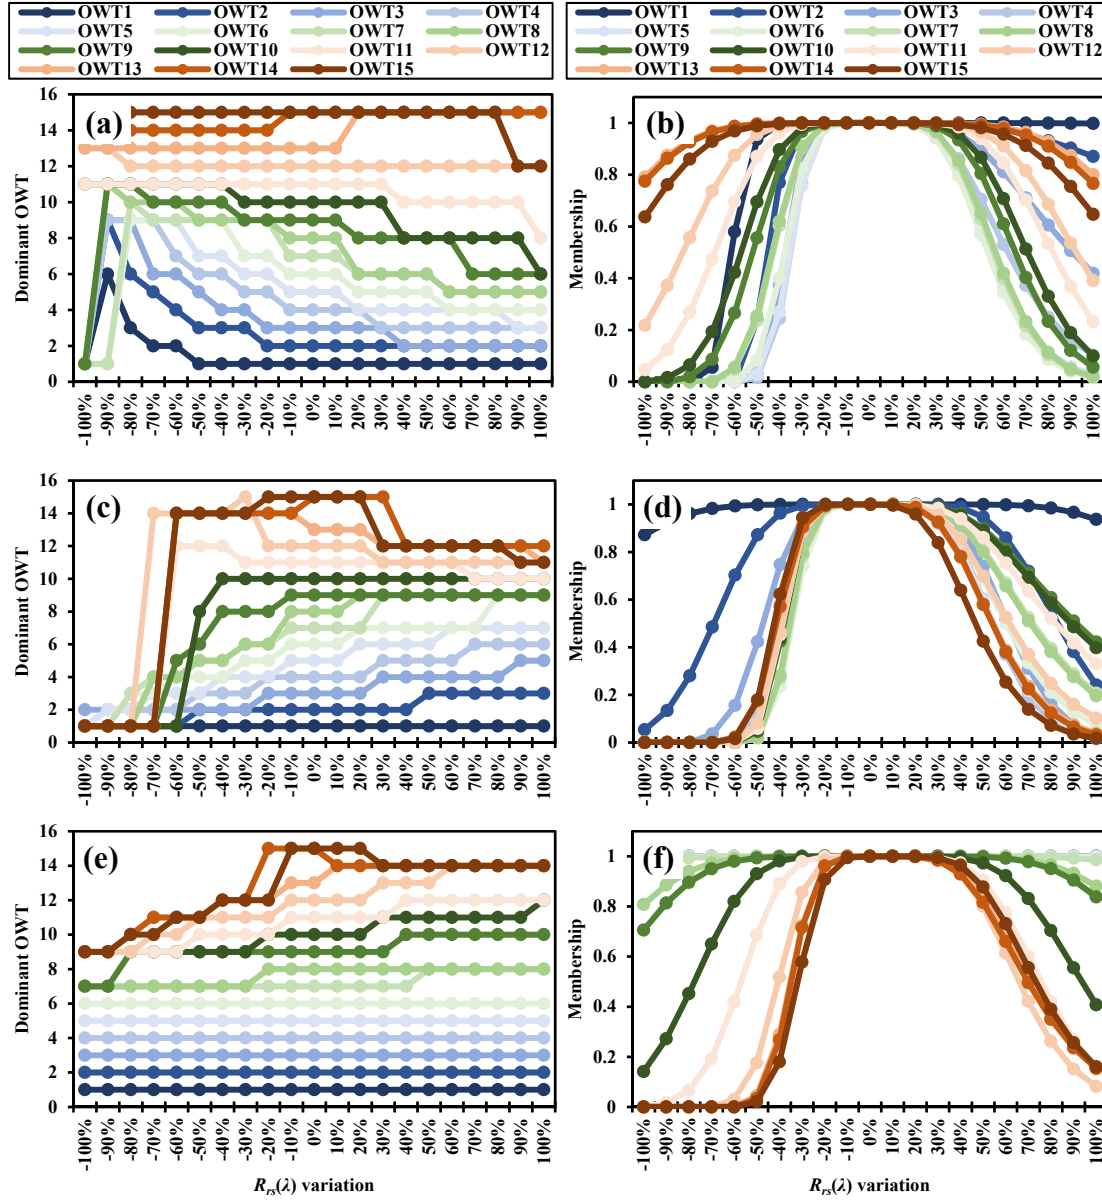

**Figure S4.** The U-OWT dominant OWT and membership changes of 15 MODIS-Aqua (8 bands) mean  $R_{rs}(\lambda)$  vectors under the variations of (a-b) the blue bands (400-500nm), (c-d) the green bands (500-600nm), (e-f) the red bands (600-700nm).



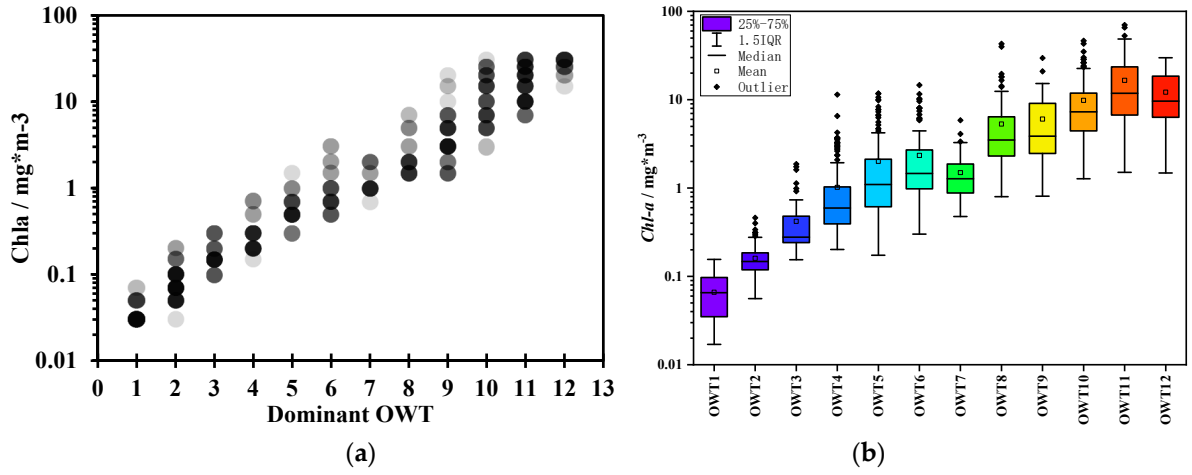

**Figure S5.** The relationships between the U-OWT and Chla concentrations. (a) Scatterplot of data pairs of the *Chla* concentrations and the U-OWT dominant OWT from the IOCCG synthetic SeaWiFS convolutional  $R_{rs}(\lambda)$  ( $N = 500$ ). This synthetic data set covers a wide range of natural waters with *Chla* concentration from 0.03 to 30 mg/m<sup>3</sup>. The points are plotted with 85% transparency to show the data density. (b) *Chla* concentration distributions of NOMAD and CCRR in-situ measurements corresponding to different U-OWT dominant OWT (OWT1-OWT12). OWT13/14/15 are not showed here due to the lack of observations.

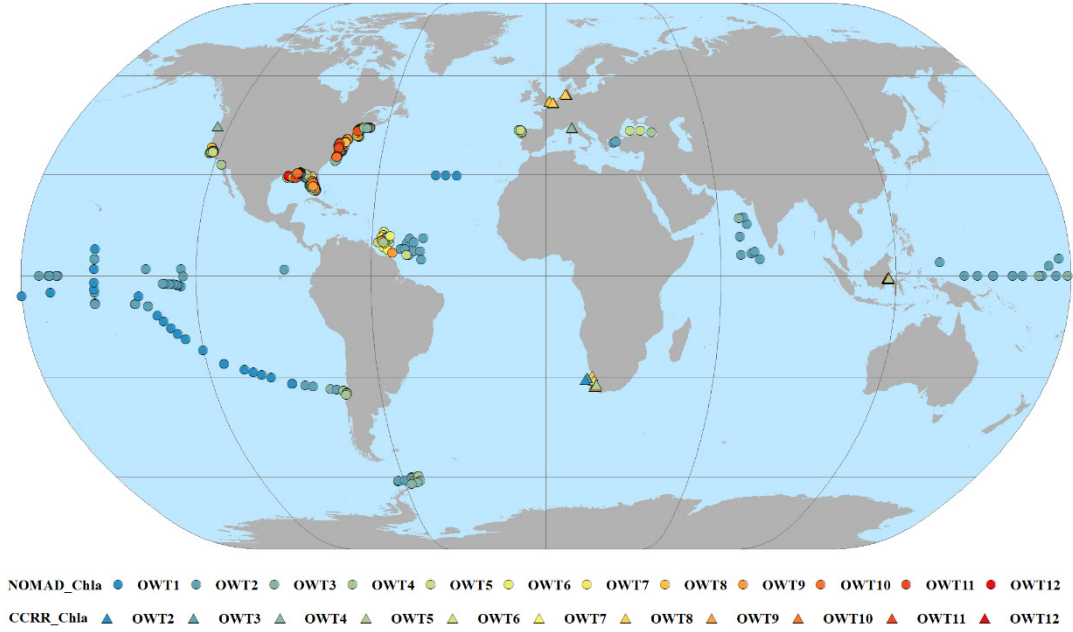

**Figure S6.** Locations of NOMAD and CCRR in-situ measurements used in this study, and their dominant OWT under the U-OWT context.
